# Supplementary material for: Dynamic nucleoplasmic and nucleolar localization of mammalian RNase H1 in response to RNAP I transcriptional R-loops
Source: Oxford University Press journal article supplement (doi:10.1093/nar/gkx710), 2017-08-04
Supplement: gkx710_supp.pdf [file gkx710_supp.pdf]

**Fig. S1**

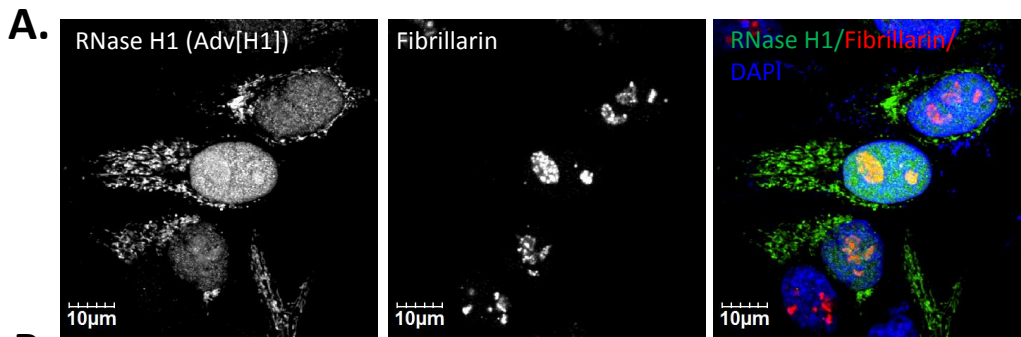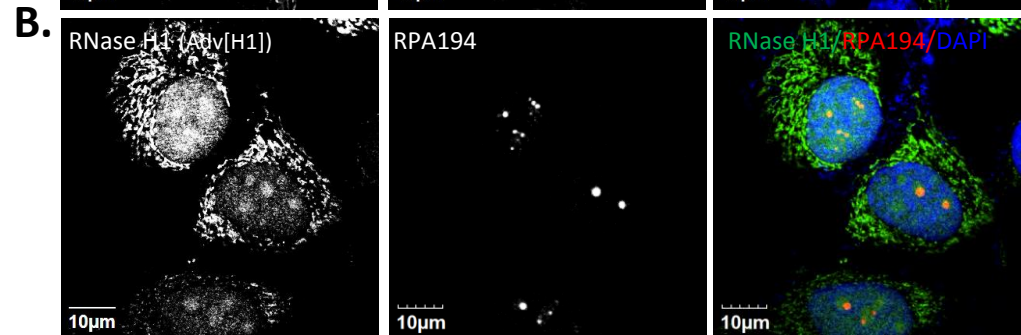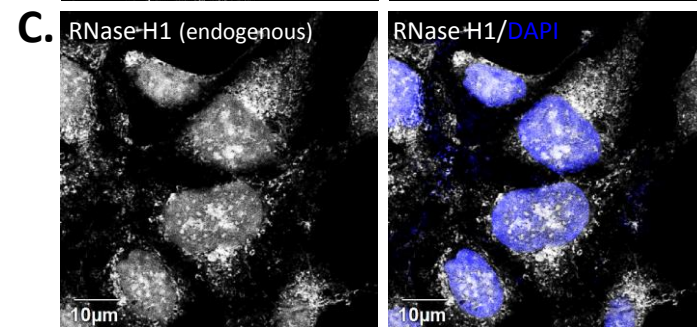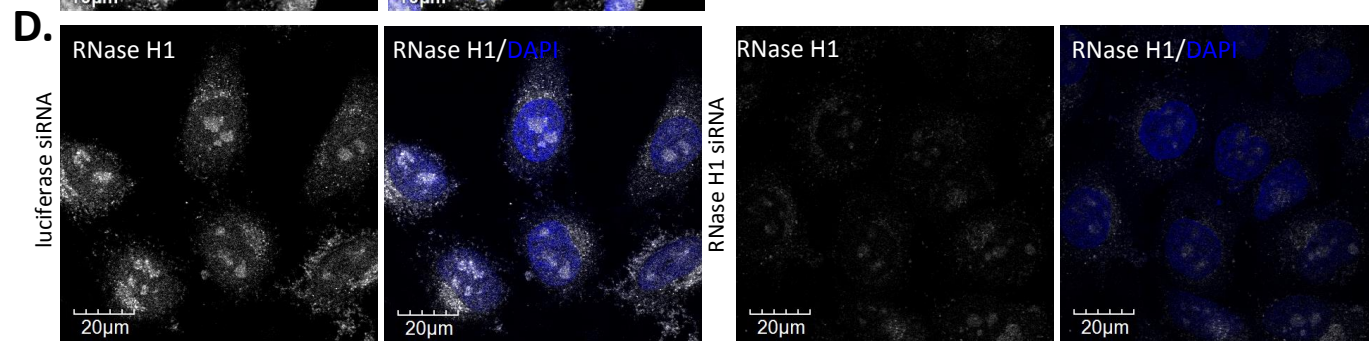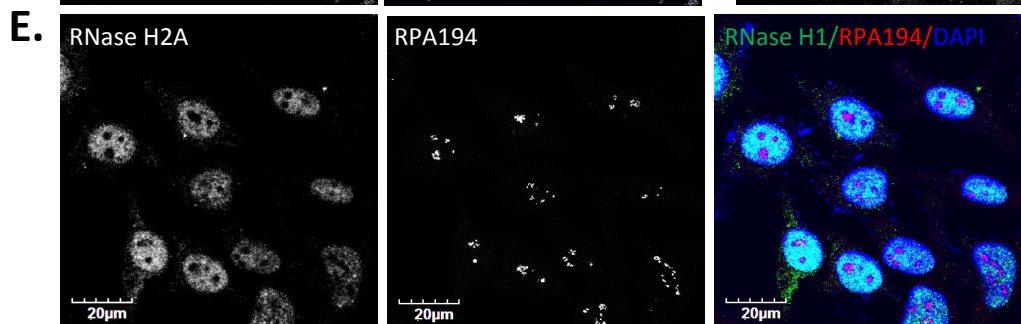

**Fig. S2**

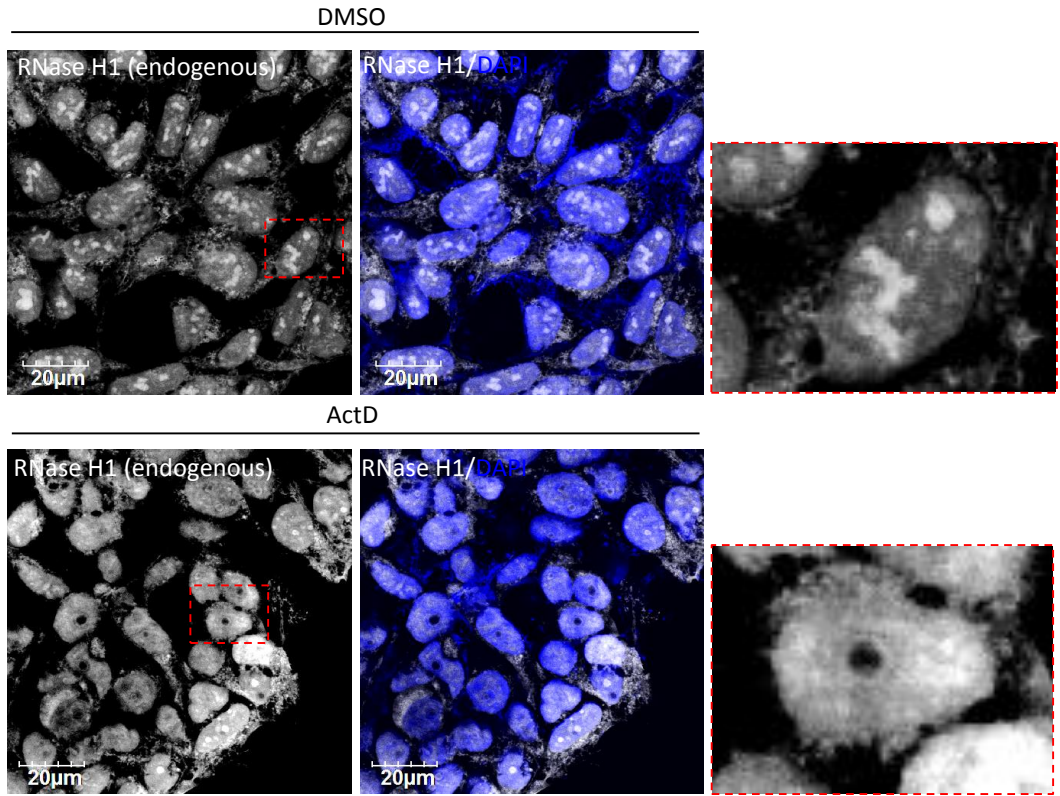

**Fig. S3**

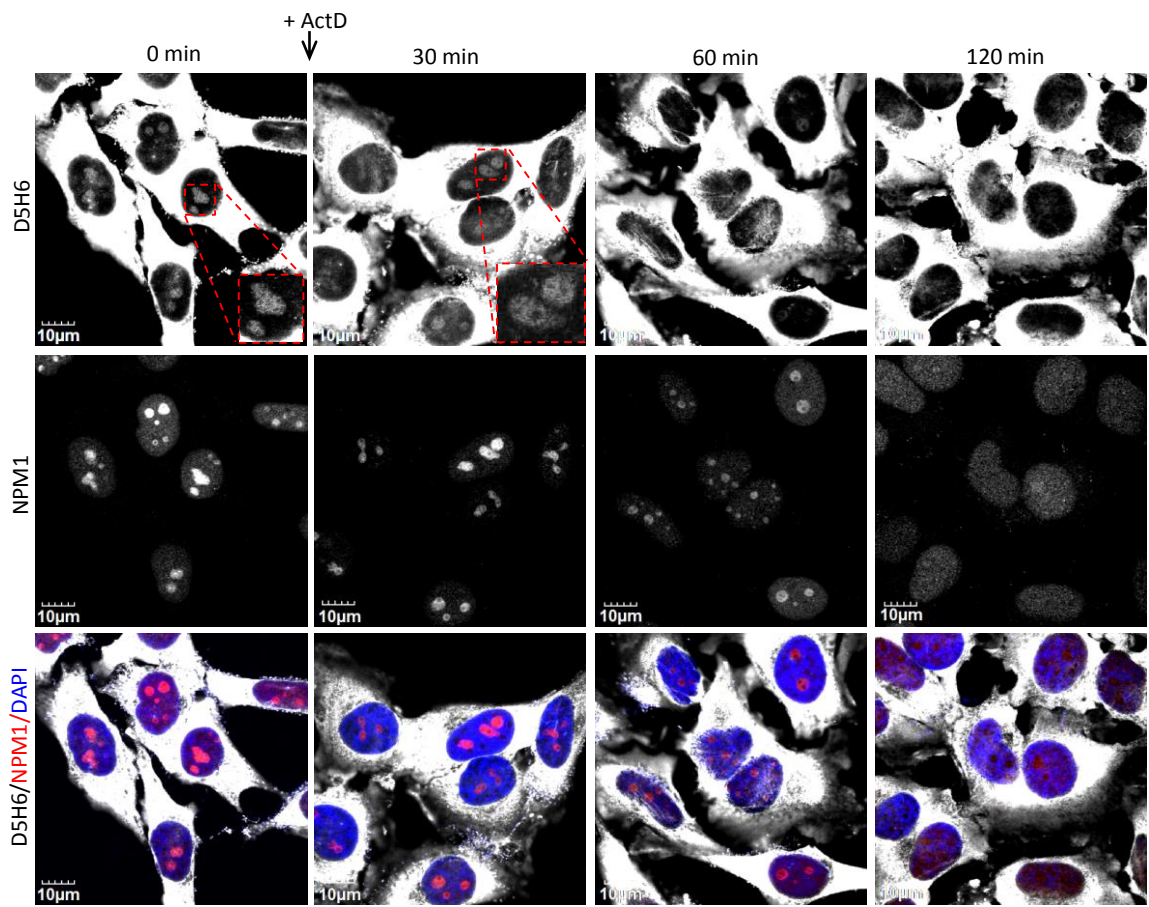

**Fig. S4 A.**

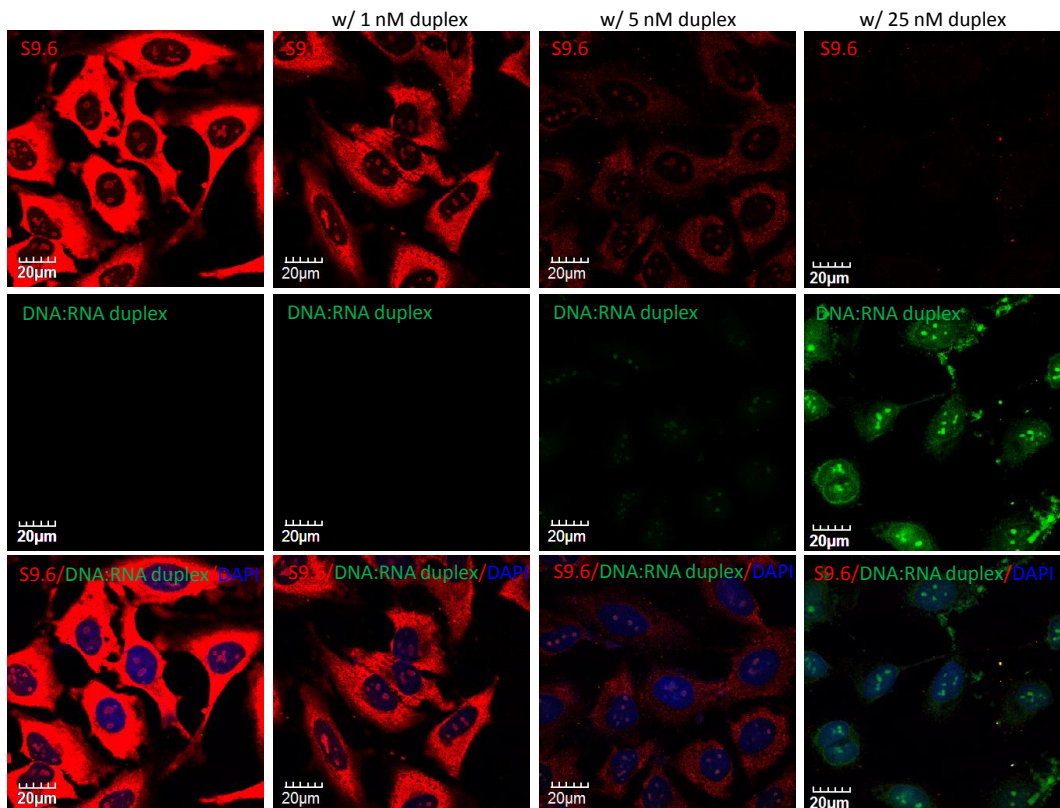

**B.**

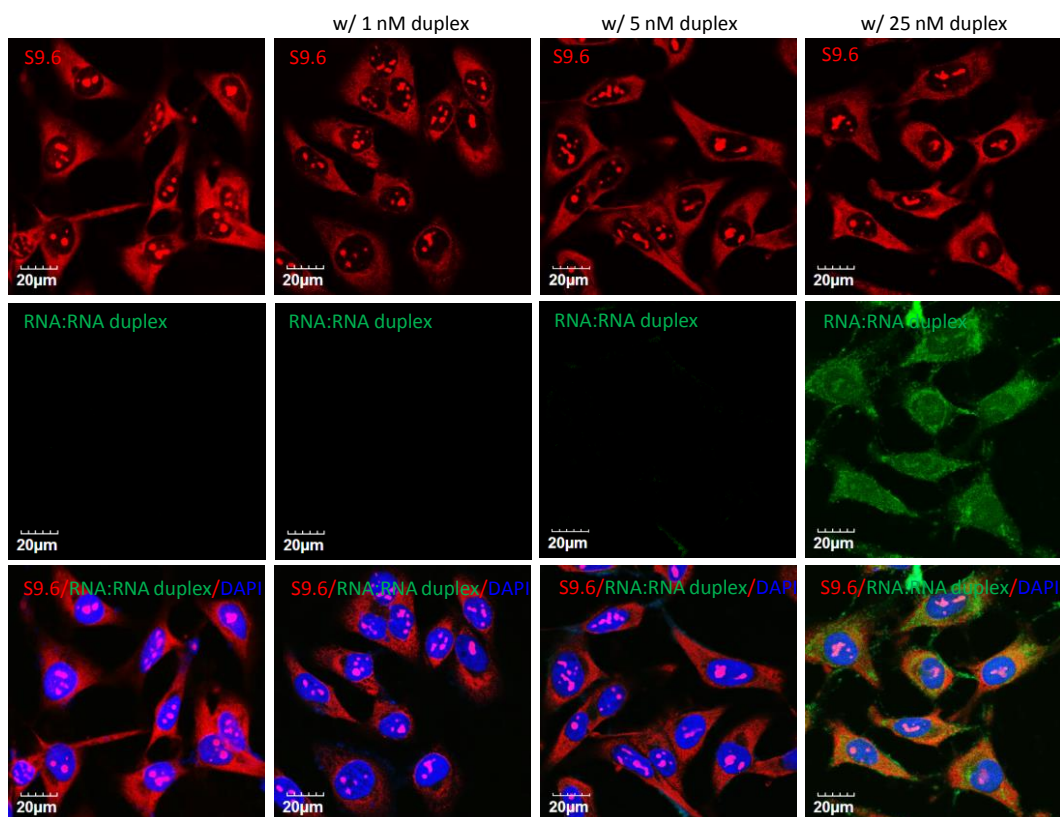

**C.**

|                 | HeLa genomic DNA |   |
|-----------------|------------------|---|
| E.Coli RNase H: | -                | + |
| DNA/RNA hybrid  |                  |   |
| Total DNA       |                  |   |

**Fig. S5**

**A.**

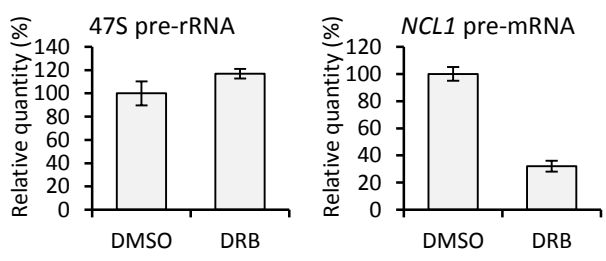

**B.**

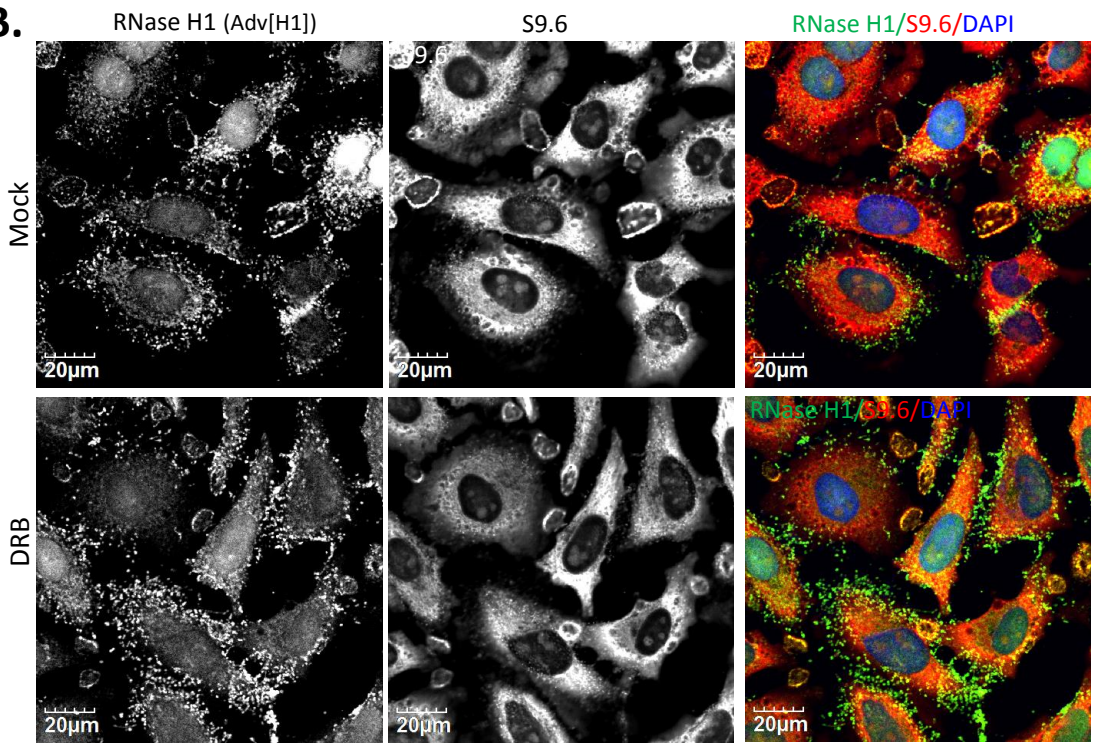

**Fig. S6**

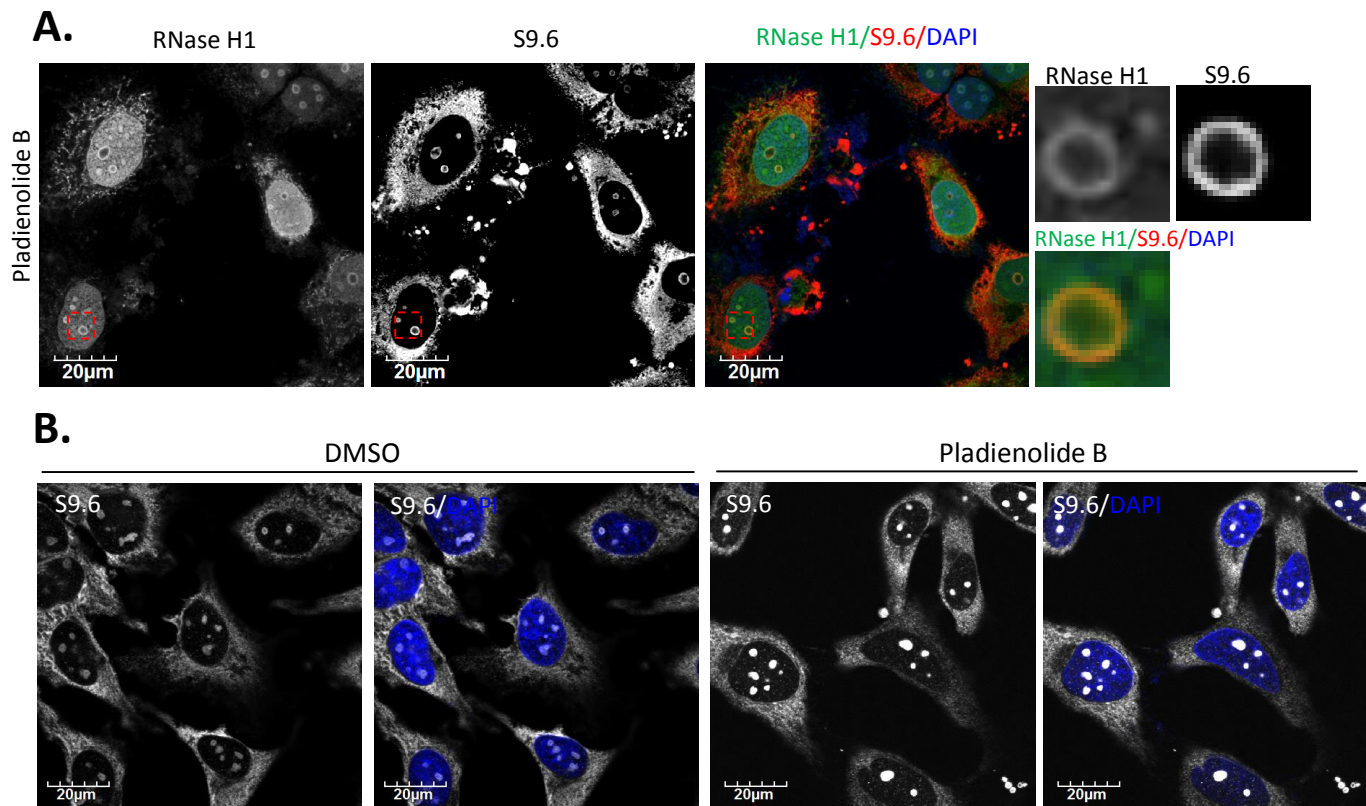

**Fig. S7**

**A.**

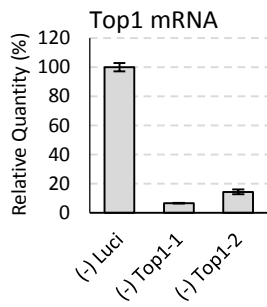

**B.**

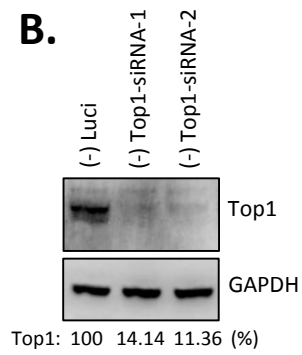

**C.**

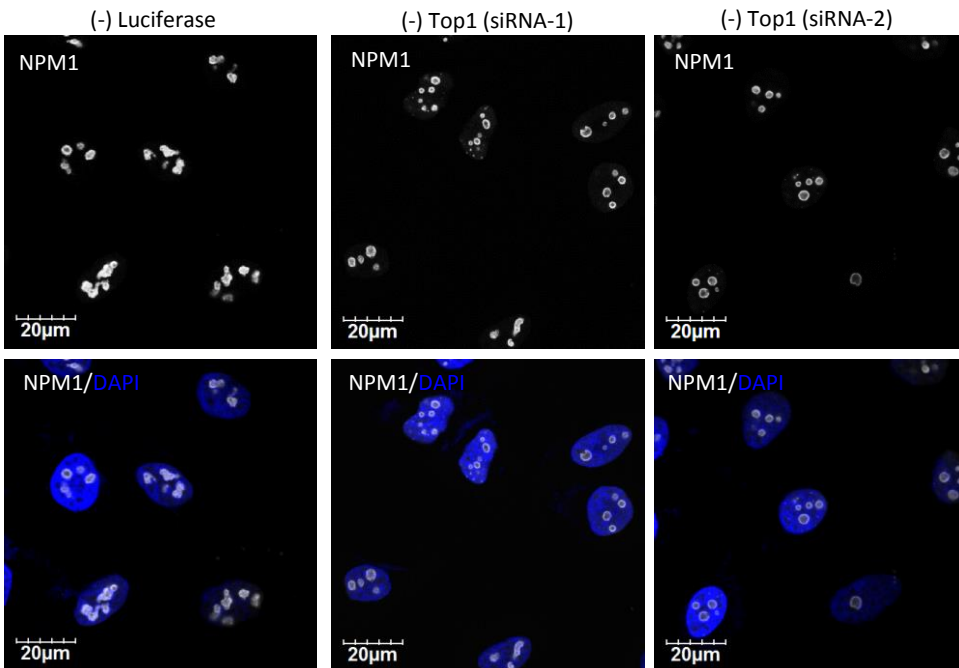

**D.**

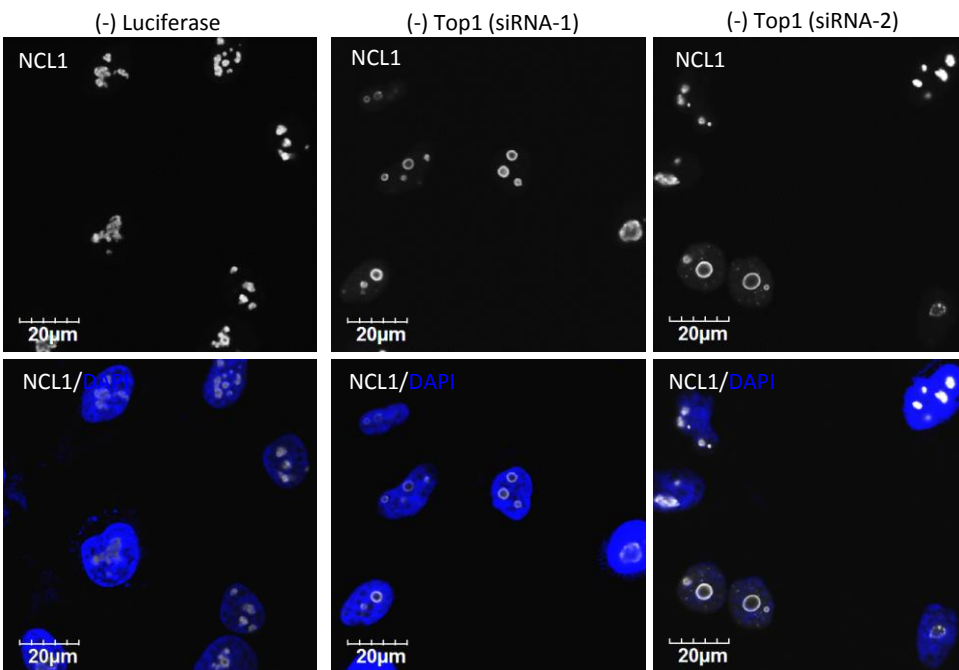

**Fig. S8**

**A.**

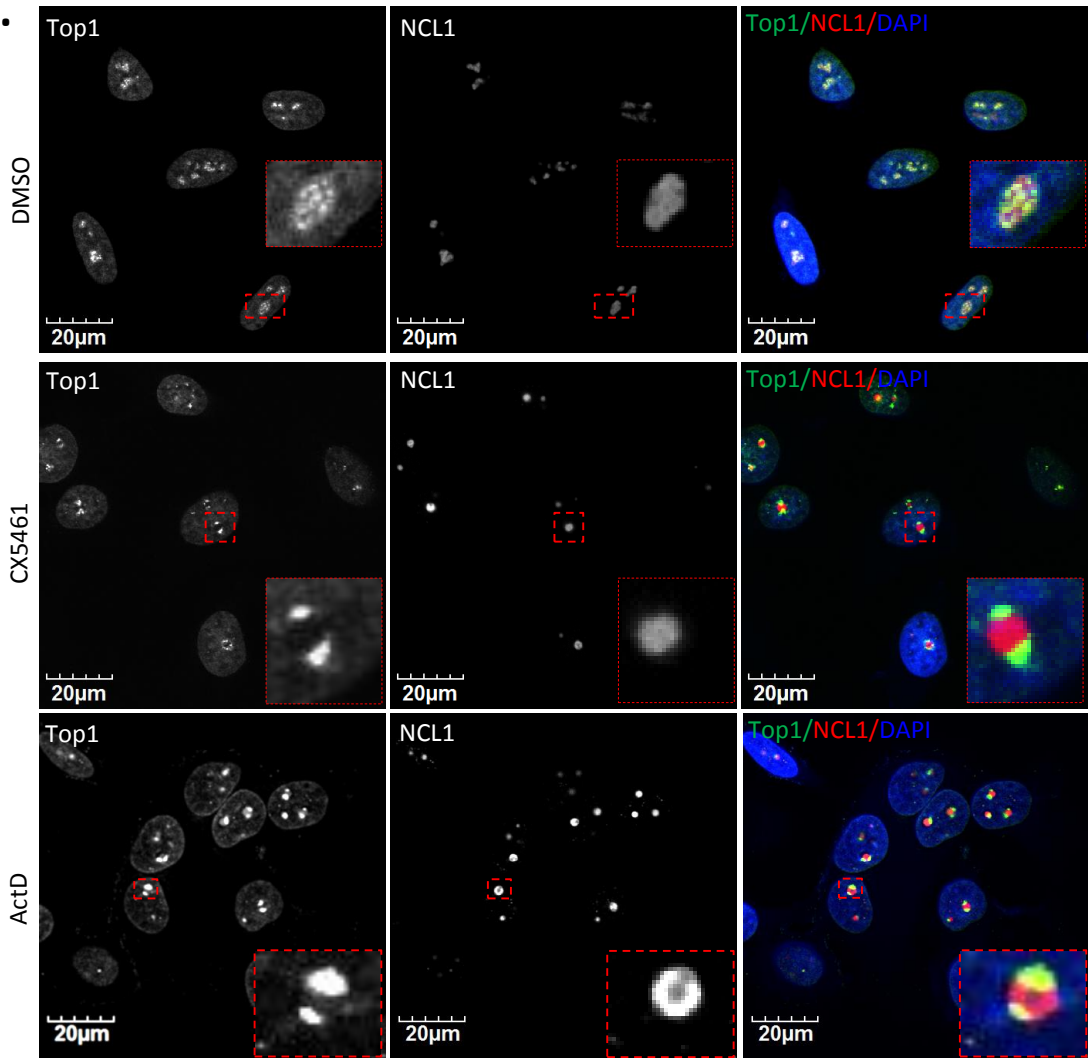

**B.**

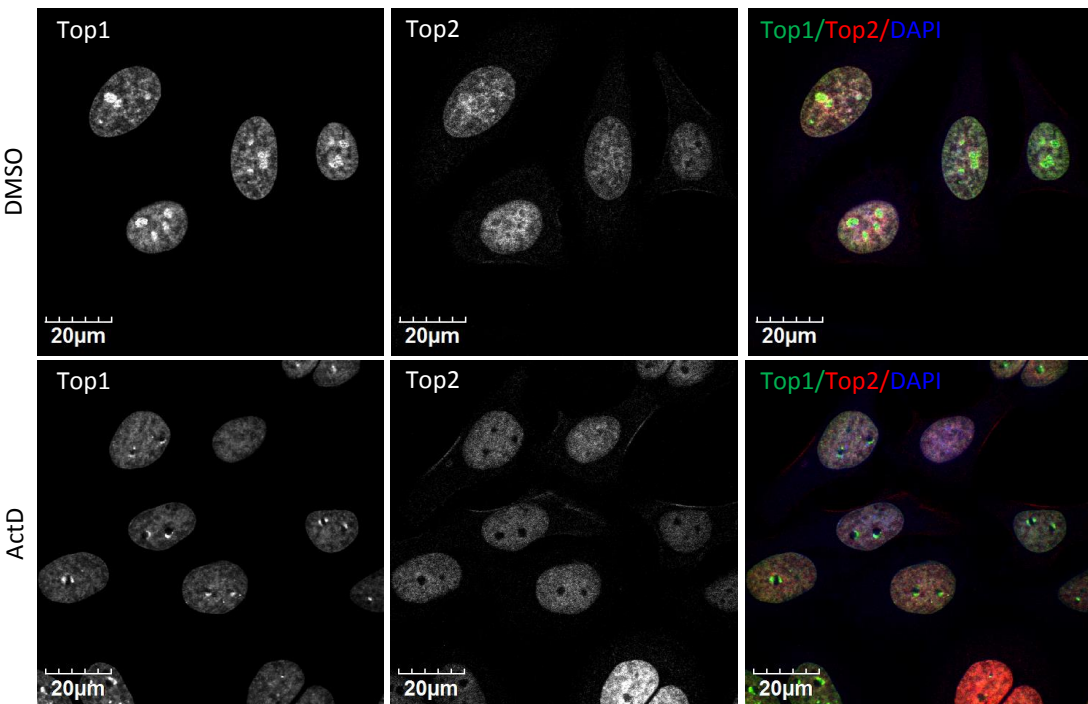



**Fig. S9**

**A.**

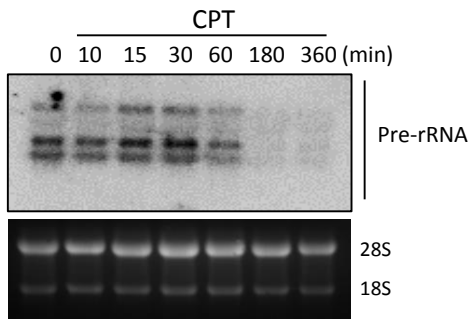

**B.**

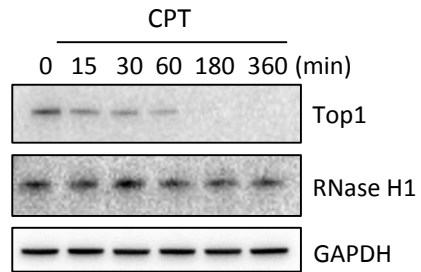

**Fig. S10**

**A.**

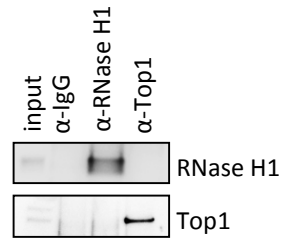

**B.**

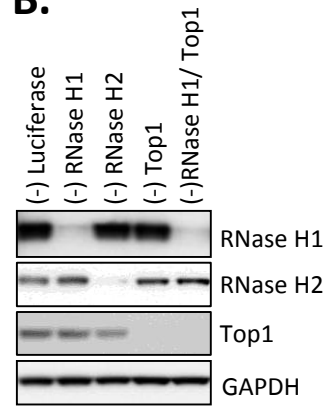

## SUPPLEMENTAL INFORMATION

### *Supplemental Figure Legends:*

#### *Fig. S1 Human RNase H1 accumulates in nucleoli*

**A-B.** Confocal immunofluorescent imaging of HeLa cells infected with AdV<sub>[H1]</sub> for 24 hours revealed co-localization of transiently overexpressed human RNase H1 with nucleolar markers **A)** fibrillarin and **B)** RPA194. **C.** Nucleolar localization was observed for endogenous RNase H1 in HEK293 cells. **D.** Depletion of RNase H1 by specific siRNA reduced the staining signals of endogenous RNase H1 in HeLa cells. **E.** Co-immunofluorescent staining of RNase H2A and RPA194 suggested that RNase H2A did not significantly localize to nucleoli.

#### *Fig. S2 RNase H1 is cleared from the nucleoli in cells treated with RNAP I inhibitor*

Representative confocal images of HEK293 cells treated with DMSO and with 0.02 µg/ml ActD for 2 h and stained for endogenous RNase H1.

#### *Fig. S3 Clearance of nucleolar R-loops upon treatment with ActD is confirmed using a second antibody specific for DNA:RNA hybrids*

Co-immunofluorescent staining of R-loops with D5H6 and anti-NPM1 in HeLa cells treated with 0.02 µg/ml ActD indicates that R-loops are cleared from nucleolar with 60 to 120 min of exposure to ActD.

#### *Fig. S4 S9.6 antibody staining specificity control.*

S9.6 antibody (2 µg/ml final concentration) was pre-incubated with (**A.**) synthetic DNA:RNA hybrids or (**B.**) duplex RNA at final concentrations of 1 nM, 5 nM, or 25 nM at room temperature for 15 min in IF blocking buffer. The pre-incubated antibody was then added to the fixed and permeabilized cells to stain for cellular DNA:RNA hybrids. The RNA strand of the hybrid is 6-carboxyfluorescein (6-FAM) labeled to allow the direct visualization of the hybrids in cells. Sequences of the hybrids used here are: DNA-5'-CTG CTA GCC TCT GGA TTT GA -3' and RNA- 5'-/6FAM/-UCA AAU CCA GAG GCU AGC AG-3'. The duplexed RNA shares the same sequences. **C.** Dot blot suggests that the S9.6 signals decrease significantly with the treatment of *E.coli* RNase H.

#### *Fig. S5 RNAP II inhibitor DRB does not affect nucleolar localization of RNase H1 and DNA:RNA hybrids*

**A.** qRT-PCR quantification of 47S pre-rRNA and *NCLI* pre-mRNA in HeLa cells treated with 10 µM DRB for 2 h. The error bars represent standard deviation from three parallel experiments. **B.** Co-immunofluorescent staining of R-loops and RNase H1 (overexpressed from AdV<sub>[H1]</sub>) in HeLa cells treated with 10 µM DRB for 2 h.

Fig. S6 *Pladienolide B* exposure causes co-migration of RNase H1 and DNA:RNA hybrids to the perinucleolar regions

**A.** Representative images of co-immunofluorescent staining of endogenous RNase H1 and R-loops (using S9.6) in HeLa cells treated with pladienolide B (5  $\mu$ M, 24 h) suggest the co-migration of RNase H1 and DNA:RNA hybrids to perinucleolar regions. **B.** Representative confocal images of HeLa cells treated with 5  $\mu$ M pladienolide B and stained with S9.6 suggest that pladienolide B exposure elevates the levels of nucleolar DNA:RNA hybrids.

Fig. S7 *Depletion of Top1 causes morphological changes of nucleoli*

**A.** qRT-PCR of Top1 depletion by two different Top1 siRNAs. **B.** Western analysis of Top1 depletion by two different Top1 siRNAs. GAPDH serves as a loading control. **C-D.** Depletion of Top1 in HeLa cells resulted in smaller and more rounded nucleoli. Nucleoli were stained using (**C.**) anti-NPM1 or (**D.**) anti-NCL1 antibodies.

Fig. S8 *Nucleolar clearance of Top1 to perinucleolar caps occurs in HeLa cells treated with ActD or CX5461*

**A.** Representative images of immunofluorescent staining of Top1 and NCL1 in HeLa cells treated with DMSO, ActD (0.02  $\mu$ g/ml, 2 h), or CX5461 (250 nM, 6 h). **B.** Representative images of immunofluorescent staining of Top1 and Top2 in HeLa cells treated with DMSO or ActD (0.02  $\mu$ g/ml, 2 h).

Fig. S9 *Treatment of cells with CPT reduces levels of Top1 protein and pre-rRNA but does not affect levels of RNase H1 protein*

**A.** Northern analysis of levels of pre-rRNA after treatment of HeLa cells with 20  $\mu$ M CPT for indicated times. Levels of mature 28S and 18S rRNA serve as loading controls. **B.** Western analysis of protein levels of RNase H1 and Top1 after treatment of HeLa cells with 20  $\mu$ M CPT for indicated times. GAPDH serves as a loading control.

Fig. S10 *Endogenous RNase H1 IP and siRNA-mediated depletion of RNase H1*

**A.** Western analysis of immunoprecipitated endogenous RNase H1 and Top1. **B.** Western analysis confirmed the depletion of RNase H1 and Top1 by siRNAs.

*Antibodies:*

Western analysis of RNase H1, immunofluorescent (IF) staining of RNase H1 (except for Fig. 1A and S1A), and RNase H1-ChIP were all performed using a polyclonal anti-RNase H1 antibody raised in rabbit against the His-tagged partial human RNase H1 (amino acid 47–287). The sequence of the antigen is: MASHHHHHHS LVPRGSSASPE VSEGHENQHG QESEAKASKR LREPLDGDGHE SAEPYAKHMK PSVEPAPPVS RDTFSYMGDF VVVYTDGCCS SNGRRRPRAG IGVYWGP GHP LNVGIRLPGR QTNQRAEIHA ACKAIEQAKT QNINKLVLYT DSMFTINGIT NWVQGWKKNG WKTSAGKEVI NKEDFVALER LTQGMDIQWM HVPGHSGFIG NEEADRLARE GAKQSED. The antibody was purified as described previously (1,2). Staining of RNase H2A was performed using a polyclonal anti-RNase H2A antibody raised in rabbit against full-length human RNase H2A and purified as described previously (3).

Supplemental Table 1. Antibodies using in this study

| Antibody              | Company       | Catalog number | Application        |
|-----------------------|---------------|----------------|--------------------|
| Top1                  | Abcam         | ab85038        | ChIP, Western blot |
| Top1                  | Abcam         | ab197505       | IF                 |
| DNA-RNA Hybrid [S9.6] | Kerafast      | ENH001         | IF, ChIP           |
| DNA-RNA Hybrid [D5H6] | CovalAb       | mab0105-P      | IF                 |
| RNase H1              | Abcam         | ab56560        | IF                 |
| NPM1                  | Abcam         | ab24412        | IF                 |
| BrdU                  | Abcam         | ab6326         | IF                 |
| Flag                  | Sigma-Aldrich | F3165          | IF                 |
| RPA194                | Santa Cruz    | sc-46699       | IF                 |
| NCL1                  | Abcam         | ab22758        | IF, western        |
| NCL1 -AF647           | Abcam         | ab202709       | IF                 |
| Fibrillarin-AF488     | Abcam         | ab184817       | IF                 |
| Fibrillarin           | Abcam         | ab4566         | IF                 |
| Top2                  | Abcam         | ab201504       | IF                 |
| p54nrb                | Santa Cruz    | sc-376865      | Western blot       |
| PSPC1                 | Abcam         | ab104230       | Western blot       |
| PARP1                 | Santa Cruz    | sc-8007        | Western blot       |
| Ku70                  | Abcam         | ab3114         | Western blot       |
| FEN1                  | Santa Cruz    | sc-28355       | Western blot       |

|                   |               |          |              |
|-------------------|---------------|----------|--------------|
| PCNA              | Abcam         | ab29     | Western blot |
| RPA70             | Calbiochem    | NA13     | Western blot |
| p32               | Santa Cruz    | sc-48795 | Western blot |
| SSBP1             | Santa Cruz    | sc67101  | Western blot |
| p21               | Abcam         | ab7960   | Western blot |
| $\gamma$ -tubulin | Sigma-Aldrich | T5168    | Western blot |
| GAPDH             | Sigma-Aldrich | G8795    | Western blot |

*ChIP-qPCR:*

Supplemental Table 2. Primer probe sequences using in this study for ChIP-qPCR

|            |                                |
|------------|--------------------------------|
| #1 Forward | TCATCCTGGCCGTCTGAG             |
| #1 Reverse | GAAAGGATCGCGGCAGAG             |
| #1 Probe   | CGGCCGAATTCGTTTCCGAGTC         |
| #2 Forward | GGTATATCTTTCGCTCCGAGTC         |
| #2 Reverse | TCACCGTAGGCCAGAG               |
| #2 Probe   | AGAGGACAGCGTGTCAATAAACC        |
| #3 Forward | AAAAGCCTTCTCTAGCGATCTG         |
| #3 Reverse | CATAACGGAGGCAGAGACAG           |
| #3 Probe   | TCCGGTACCCCAAGGCAC             |
| #4 Forward | CCGCGCTTACCTTACCT              |
| #4 Reverse | CGACCAAAGGAACCATAACTG          |
| #4 Probe   | TGAGCCATTCGCAGTTTCACTGTACC     |
| #5 Forward | GCGAGAGCCGAGAACTCG             |
| #5 Reverse | ACCAACGACACGCCCTTC             |
| #5 Probe   | TCTCTCTCCCCCGTCTCC             |
| #6 Forward | TTTGCTGTCTCGTCTGGC             |
| #6 Reverse | TCCACCGCTAAGAGTCGT             |
| #6 Probe   | CGCCCTCGCCAAATCGACCTC          |
| #7 Forward | GACACTTCGAACGCACTTG            |
| #7 Reverse | CTCAGACAGGCGTAGCCCCG           |
| #7 Probe   | GATTGATCGGCAAGCGAC             |
| #8 Forward | CAGGTCTCCAAGGTGAACAG           |
| #8 Reverse | CTTAGAGCCAATCCTTATCCCG         |
| #8 Probe   | CAGGTCTCCAAGGTGAACAG           |
| #9 Forward | TGT TCC CGT GAG AGT GAT TTC    |
| #9 Reverse | GCC TGA CTC CAT TTC GTA TTT TC |
| #9 Probe   | TC ACG TCT GTC ATC CCG AGG TCA |

Supplemental Reference:

1. Wu, H., Lima, W.F. and Crooke, S.T. (2001) Investigating the structure of human RNase H1 by site-directed mutagenesis. *The Journal of biological chemistry*, **276**, 23547-23553.
2. Wu, H., Lima, W.F., Zhang, H., Fan, A., Sun, H. and Crooke, S.T. (2004) Determination of the role of the human RNase H1 in the pharmacology of DNA-like antisense drugs. *The Journal of biological chemistry*, **279**, 17181-17189.
3. Wu, H., Sun, H., Liang, X., Lima, W.F. and Crooke, S.T. (2013) Human RNase H1 is associated with protein P32 and is involved in mitochondrial pre-rRNA processing. *PloS one*, **8**, e71006, 71001-71015.
